# Supplementary material for: Research on the Spatiotemporal Evolution and Driving Factors of the Coordinated Development of the Rural Economy–Ecology– Society–Innovation System in Guangdong Province
Source: Research Square preprint supplement (doi:10.21203/rs.3.rs-7523871/v1), 2025-09-30
Supplement: Supplementary file 1 [file ab78a0cf43255abd89d730a1.xlsx]

## Sheet: 数据
城市	耦合值	耕地面积（公顷）	人均绿地面积(平方米)	人口密度（人/平方公里）	颗粒物PM10年平均浓度(μg/m3)	颗粒物PM2.5年平均浓度(μg/m3)	农用化肥施用量（吨）	农用塑料薄膜使用量(吨)	农药使用量(吨)	节能环保支出占GDP的比重	新增水土流失综合治理面积（千公顷）	各市除涝面积（千公顷）	地均粮食产量（吨）	地均蔬菜产量（千克）	地均水果产量（吨）	人均猪肉产量（吨）	农业机械化程度（(万千瓦)）	农林牧渔业产值（亿元）	农村人均可支配收入（元）	农林牧渔业在岗人数（万人）	公路密度（通车里程/国土面积）公里/平方公里	城乡社区支出（亿元）	乡村社会消费品零售总额（亿元）	中小学生师比（%）	卫生事业机构床位数（张）/每万人	城乡居民基本养老保险参保人数（万人）/常住人口	城乡居民基本医疗保险参保人数（万人）/常住人口	科学研究和技术服务业在岗职工年末人数（万人）	科技经费支出（万元）	专利授权数（件）
2017
广州	0.62439	80963.3	22.67	1999.98	56	35	93893.8	2759	2809.63	0.00133507	4.88	54.82	0.333986	1711	0.550908	0.00328128	134.812	396.7	23496.4	0.17	1.28198	390.09	255.15	3.29014	51.6656	0.757052	0.665235	13.41	1024444	60201
深圳	0.517531	3635.12	15.95	6272.08	45	28	13044.9	365	266	0.0091511	0.39	7.36	0.258811	1087	0.433824	0.000384298	118.336	38.86	17370	0.05	0.797073	982.96	13.22	2.00954	25.0594	0.714616	0.879545	10.09	71124	94250
珠海	0.346067	17773.1	19.8	1016.67	43	30	6224	2168	230	0.00586311	1.17	16.1	0.366547	1266	0.780702	0.0122693	28.5089	91.63	14904.7	0.64	0.836982	104.77	31.62	3.23646	45.3773	0.632483	0.84586	1.18	8732	12544
汕头	0.349311	37221.4	15.16	2550.17	49	29	56095	1060.39	2664.33	0.00432825	0.73	36.88	0.435273	2459	1.35913	0.0105021	30.6119	190.13	15779.7	0.05	1.89007	35.51	451.9	3.508	33.0131	0.68692	0.917371	0.42	4620	9593
佛山	0.448601	36691.1	16.55	2016.13	63	40	27563.6	1071	1245	0.00202917	1.81	66.36	0.350825	1727	1.36943	0.0109112	90.7784	270.33	26389.6	0.02	1.38728	84.39	683.11	3.48812	39.1927	0.648996	0.575273	1.81	5577	36767
韶关	0.337691	220307	13.83	161.803	52	38	97125	5202	4285	0.0112206	8.85	18.93	0.391874	1593	0.949762	0.0577565	164.367	243.41	14107.6	0.15	0.904951	35.1	89.47	3.22334	60.1997	0.606373	1.03406	0.33	6890	1486
河源	0.277709	144151	12.79	197.469	48	29	127213	1457.3	2488	0.00834624	14.09	0.84	0.395408	1344	0.746738	0.0254715	77.1698	160.9	13300.8	0.08	1.03489	30.89	137.24	3.00055	50.5881	0.731182	1.12569	0.19	1804	1866
梅州	0.340229	163007	17.1	275.729	50	30	153318	3324	4566	0.00986572	14.07	10.58	0.395222	2115	1.15947	0.0423229	128.609	301.99	14088.5	0.04	1.12389	40.92	176.97	3.35888	44.4703	0.692914	1.17739	0.32	5520	1671
惠州	0.375648	139602	17.88	420.978	51	29	90671.2	2856.05	4699.75	0.00556364	10.28	35.03	0.349243	1702	0.948186	0.0185768	109.388	266.55	19284.3	0.11	1.26561	56.48	263.93	3.1831	39.4761	0.609688	0.753556	0.62	10507	11706
汕尾	0.151874	97091.6	14.41	628	43	27	61152	1627	3737	0.00416771	0.02	21.44	0.32529	1586	0.544084	0.0157769	105.028	205.21	13501.3	0.12	1.43128	41.25	152.24	3.50402	33.9057	0.736663	1.12328	0.07	903	903
东莞	0.422228	13146	24.23	3391.15	51	37	3672	434	638	0.00336419	0.24	17.89	0.328082	1365	0.286014	0.000240797	47.3025	35.49	29078.3	0.03	2.13469	77.63	324.51	2.53131	28.7665	0.668921	0.545251	1.6	8945	45204
中山	0.371567	11782.7	16.5	1827.69	49	33	12495.6	1620.86	640.785	0.00525255	0.06	30.73	0.338243	1625	1.74082	0.00404268	79.023	99.9	30012.4	0.0586	1.49411	89.88	115.77	2.86171	36.4941	0.591811	0.638647	0.4	2235	27444
江门	0.362177	156262	18.34	479.829	60	37	125491	5672	6067.85	0.0017335	3.2	48.93	0.341951	1451	0.900558	0.0378612	169.847	338	16473.3	0.06	1.07656	21.9	308.29	3.67772	48.9637	0.822949	0.835935	0.39	3359	8577
阳江	0.281028	149401	12.98	319.625	48	33	97226.4	1927	4215.63	0.00154958	1.67	8.52	0.343561	1102	0.490788	0.0690181	105.701	348.54	15341.7	0.38	1.33713	14.75	155.49	2.81474	51.6482	0.707562	1.04818	0.21	756	1671
湛江	0.463493	466949	14.24	550.787	42	29	463160	2480	17080.4	0.00220767	6.95	31.77	0.341908	1704	1.83044	0.0422455	416.049	788.34	14484	1.44	1.78159	17.4	297.39	4.1582	50.252	0.543212	1.02396	0.6	26970	3006
茂名	0.398119	227079	16.82	542.903	50	32	351543	2203	12989	0.00370696	2.85	15.74	0.390456	1825	0.983872	0.0865802	209.223	743.84	15695.2	0.71	1.53805	17.93	467.94	4.22419	56.1034	0.620235	1.07153	0.42	3834	1867
肇庆	0.338454	148560	20.11	276.364	57	41	202143	2384	6161	0.00165397	9.11	45.01	0.388482	2071	1.41485	0.0839358	165.44	497.99	16430.5	0.08	0.95902	14.66	234.56	4.00632	41.131	0.595339	1.01149	0.28	2174	2332
清远	0.309979	268780	12.69	202.779	58	36	172382	3151	6935.21	0.00301112	10.6	26.22	0.305344	1539	0.982022	0.0573645	107.31	358.84	14026.8	0.14	1.30507	26.92	151.76	3.45876	42.7738	0.709492	1.03174	0.23	628	1906
潮州	0.255498	35393.6	12.43	842.564	50	30	50881	1164.4	3562	0.0025815	6.35	22.5	0.426754	2221	1.0065	0.0159404	42.5049	118.72	13672.9	0.01	1.71345	13.36	81.61	3.51136	25.8983	0.613665	1.02038	0.15	1272	3006
揭阳	0.287052	87132.8	14.03	1155.75	55	34	104005	1001.9	4731	0.00408103	2.29	26.62	0.408306	2387	0.599721	0.0161579	54.8089	245.25	13206.7	0.18	1.42526	16.97	301.16	4.37103	32.1265	0.604453	1.033	0.14	4200	3932
云浮	0.218679	102449	17.08	321.819	57	37	70053	1939	4609	0.00263474	2.92	3.27	0.414411	1369	0.659877	0.0409543	100.246	229.29	14124.4	0.04	0.989973	7.69	83.86	3.92703	41.8028	0.69782	1.15302	0.1	966	891
2018
广州	0.615994	128272	22.95	2055.99	54	35	105922	2658	3100	0.00178313	6.73	54.82	0.329491	1684.52	0.646948	0.00247813	126.592	416.692	26020.1	0.1338	1.23686	415.293	266.13	3.03329	52.9072	0.504824	0.275702	13.908	957615	89826
深圳	0.532277	3635.12	15.35	6521.55	44	26	10950	253	244	0.00999324	1.08	7.36	0.258898	1077.2	0.636839	0.000248061	119.256	42.4606	19407.3	0.0256	0.354377	821.359	13.22	1.74337	25.9375	0.694896	0.163058	12.8108	147747	140202
珠海	0.392108	32992.7	19.9	1089.05	43	27	5937	2060	217	0.00359676	4.23	16.1	0.366975	1303.85	0.601672	0.016354	27.1236	100.254	26198.4	0.6519	0.898929	126.027	32.15	3.04632	44.8121	0.628293	0.273067	1.3088	7228.1	17090
汕头	0.336043	59020.1	15.16	2563.95	44	27	50361	1138	2886	0.00538537	1.06	36.88	0.439569	2501.47	1.51136	0.0107175	30.9927	204.519	16246.1	0.0368	1.89867	30.1109	492.47	3.18715	34.6069	0.63213	0.811567	0.3548	6066.8	12651
佛山	0.432942	75590.1	17.25	2081.7	60	35	27829	1165	1231	0.00169996	2.63	59.98	0.3442	1703.88	1.3776	0.00969483	91.4631	289.886	28764.7	0.0136	1.36047	101.271	674.95	3.22059	40.2002	0.518239	0.239682	1.9293	5478.6	51010
韶关	0.351071	228708	13.87	162.802	49	36	96756	5228	4167	0.0104971	7.23	19.77	0.397953	1608.8	0.962646	0.0600295	167.022	254.07	15433.7	0.1161	0.920429	29.8805	98.21	3.29991	63.8493	0.637159	0.832862	0.3188	6592.5	3808
河源	0.278329	143868	13.4	197.647	45	29	122529	1426	2417	0.00859006	11.2	0.84	0.396245	1352.32	0.772358	0.026328	77.8868	168.636	14620.3	0.0672	1.04895	50.3823	147.69	2.7746	55.5528	0.637483	1.0026	0.1742	1565	2530
梅州	0.362139	175928	17.03	276.012	49	30	148486	3434	4619	0.0131471	18	10.58	0.39416	2152.4	1.2066	0.0436179	130.68	314.697	15173.3	0.0209	1.1822	43.5381	173.35	3.13584	47.6473	0.70026	1.06043	0.348	6471.8	2018
惠州	0.375644	149123	16.78	425.649	47	28	88808	2631	4620	0.00787844	12.28	35.03	0.342162	1745.93	1.00762	0.0178968	110.99	280.286	21039.1	0.0786	1.28187	49.885	289.616	2.85489	36.6876	0.571607	0.479161	0.6528	7608.5	14705
汕尾	0.211049	108755	15.09	631	41	23	59989	1752	3641	0.00578684	0.31	21.44	0.324095	1603.31	0.593425	0.0165911	107.106	219.869	14851.5	0.0706	1.39188	31.3099	166.55	3.36363	36.7874	0.658558	1.01353	0.0701	672.2	2485
东莞	0.417226	35642.8	24.06	3411.35	50	36	3449	537	542	0.00463025	3.64	17.89	0.322318	1377.55	0.349821	0.000103758	47.8025	39.2133	32276.9	0.0303	2.1348	68.8435	371.87	2.1425	29.7566	0.572195	0.545251	1.8169	10260.4	65985
中山	0.364703	48406.9	16.41	1855.72	45	30	12252	1395	615	0.00293739	3.24	30.73	0.32928	1573.22	1.56535	0.00306119	80.15	105.741	32263.3	0.0586	1.49711	101.492	111.64	2.74782	36.85	0.59841	0.638647	0.4805	1919.4	34114
江门	0.38332	210219	17.88	483.669	56	31	125097	5982	6056	0.00269222	10.65	48.93	0.336709	1438.86	1.0635	0.0374217	174.336	361.694	18153.6	0.0969	1.02453	22.2244	339.12	3.50877	49.9213	0.684829	0.538759	0.5879	4916	12273
阳江	0.297009	211776	16.17	321.222	44	31	96234	1423	4093	0.00353678	2	8.52	0.342012	1110.52	0.52396	0.0708921	108.171	361.876	16799.1	0.4093	1.33985	13.3843	170.27	2.82727	55.1971	0.676592	0.939408	0.1879	1318.6	3274
湛江	0.462384	507213	16.97	552.823	39	27	445720	2634	16923	0.00182375	0.38	31.77	0.339074	1739.5	1.90712	0.0437992	421.359	844.724	15888.9	1.3953	1.77239	42.8981	317.46	3.79792	52.55	0.569855	0.905121	0.5704	26791.9	5012
茂名	0.399636	251216	17.5	552.451	48	28	349470	2333	12859	0.00346352	3.07	15.74	0.38921	1862.71	1.06293	0.0879931	204.204	773.49	16950.8	0.6845	1.54229	28.9244	510.605	3.96601	57.6731	0.599307	0.987453	0.3853	3931.5	2591
肇庆	0.365065	187682	19.98	278.798	55	39	173461	2193	5727	0.00204538	16.01	45.01	0.386681	2125.88	1.44527	0.0841837	172.189	525.844	17695.7	0.0544	0.965073	14.503	257.5	3.79065	42.6657	0.611122	0.846148	0.3006	3339.7	3901
清远	0.314905	296041	14.13	203.514	57	38	171242	2554	7157	0.00271056	5.54	27.38	0.307264	1556.38	1.02956	0.0569144	108.88	377.601	15162.9	0.025	1.21367	20.6553	171.15	3.28875	45.3424	0.616046	0.861784	0.2922	380.4	3284
潮州	0.263554	48469	12.74	844.408	48	29	46015	1081	3299	0.00407837	0.28	22.5	0.423402	2249.96	1.05926	0.0157691	41.9096	130.655	14944.5	0.01	1.71477	10.5793	88.3	3.24163	25.8182	0.628762	0.891645	0.1522	1561.5	5277
揭阳	0.273049	121135	12.6	1156.4	56	35	103865	987	4729	0.00462016	0.37	26.7	0.406302	2436.47	0.625966	0.0165642	54.8089	257.576	14421.7	0.1347	1.4273	9.9382	308.07	4.18086	35.2698	0.554886	0.997074	0.1245	1917.6	4597
云浮	0.220408	123681	16.38	324.581	53	33	68823	1950	4542	0.00520057	9.26	3.27	0.412599	1417.17	0.705525	0.0425625	101.472	248.332	15240.3	0.0278	0.995162	6.5451	86.63	3.74737	42.8745	0.648242	1.0477	0.0893	744.3	1340
2019
广州	0.627472	128011	23.72	2111.37	53	30	102875	2635	2863	0.00354824	5.78	54.82	0.332709	1734.9	0.671488	0.00172624	124.17	446.311	28867.9	0.1951	1.23901	455.293	286.547	2.8642	54.6524	0.0765039	0.27254	16.6319	1.10814e+06	104813
深圳	0.519042	3617.53	14.94	6727.91	42	24	9633	397	247	0.0123158	1.64	7.36	0.261995	1102.05	0.672543	0.000249065	120.466	48.1641	21270.2	0.0342	0.358914	1015.4	21.0323	1.70567	28.1484	0.000597638	0.173656	13.9791	175849	166609
珠海	0.345429	32904.1	21.23	1165.42	41	25	5733	2079	203	0.00606539	3.62	16.53	0.390653	1333.47	1.1042	0.00636118	27.2	105.306	29069.3	0.0417	0.842984	111.078	27.5975	3.14887	43.8846	0.0408101	0.270121	1.3799	34680.7	18967
汕头	0.352174	58974.1	14.35	2575.9	39	23	49454	1151	2803	0.00497758	0.59	36.88	0.455295	2530.47	1.54012	0.00830132	31.13	224.325	17735.3	0.0317	1.89867	37.8119	434.909	3.06523	35.672	0.39263	0.804741	0.5591	13904.6	14809
佛山	0.442197	64467.9	17.78	2148.29	56	30	25698	1214	1125	0.00193917	1.77	59.98	0.353742	1702.86	1.45859	0.00858876	91.76	319.561	31503.4	0.0676	1.37249	127.487	435.599	3.2123	40.3811	0.0560698	0.242211	2.1598	52037.4	58747
韶关	0.344204	228671	16.54	164.584	43	29	94930	4034	3742	0.0183706	6.38	19.92	0.417296	1622.57	0.971455	0.0524492	169.52	286.778	16940.1	0.0724	0.925381	40.2136	62.6071	3.32698	67.1975	0.3668	0.827054	0.3825	7436.5	3307
河源	0.284034	143823	13.43	198.395	42	24	120238	1473	2352	0.0099627	6.66	0.84	0.405064	1353.29	0.798255	0.0231528	78.39	189.443	16030.3	0.0383	1.07	58.0969	90.8657	2.8264	60.58	0.464815	0.966304	0.2916	2189.8	2936
梅州	0.342767	175906	19.78	276.277	42	26	146428	3368	4438	0.00792715	16.38	10.58	0.409269	2217.97	1.26398	0.0367877	131.83	360.657	16447.2	0.0405	1.23443	37.2001	174.401	3.40644	50.4771	0.431157	1.04758	0.3373	7692.7	2574
惠州	0.385101	149056	16.37	430.055	47	25	86119	2684	4379	0.00715276	9.21	35.03	0.354588	1773.52	0.957688	0.0148239	111.11	328.08	23027.4	0.0897	1.21003	63.2144	382.986	2.87228	36.5889	0.180403	0.421531	1.0356	8554.4	14577
汕尾	0.206338	108725	11.57	619.726	37	21	57877	1742	2293	0.00772934	2.03	21.44	0.343884	1659.32	0.624809	0.0151248	108.32	246.767	16304.7	0.0657	1.42124	46.3372	120.871	3.34771	38.0547	0.365241	0.986673	0.0993	703.6	2529
东莞	0.456072	35515.6	19.49	3440.74	48	32	3223	438	520	0.00657211	2.69	17.89	0.314624	1382.01	0.288786	7.38403e-05	48.3	43.9764	35904.5	0.1011	2.14355	94.3049	389.178	2.15524	31.6031	0.00619053	0.545251	5.5051	41756.2	60419
中山	0.356776	48329.9	16.56	1894.97	43	27	11862	1189	557	0.00260875	2.53	30.73	0.332947	1480.2	1.74487	0.000983749	80.86	104.607	35121.6	0.0586	1.49727	111.737	132.763	2.76619	36.7515	0.000645955	0.638647	0.7632	2763	33395
江门	0.38872	210117	19.6	487.045	49	27	123049	6299	5962	0.0026854	10.17	48.93	0.342969	1475.92	1.10724	0.0313271	177.76	459.255	19873.3	0.1009	1.00762	22.5912	290.757	3.54503	51.0141	0.321727	0.524767	0.6398	5999	13282
阳江	0.298695	211714	23.75	323.145	42	28	95738	1521	4087	0.00703461	2.05	8.52	0.351595	1121.99	0.49667	0.0629634	109.51	403.523	18331.9	0.0741	1.34021	8.74	114.714	2.85945	59.9869	0.478974	0.93314	0.2643	1253.2	3133
湛江	0.453581	507169	17.56	554.934	39	26	436039	2685	16063	0.00285181	0.54	21.77	0.359854	1780.9	1.95393	0.0363136	426.94	937.901	17343	0.9876	1.77304	30.6357	326.969	3.70131	55.1392	0.395942	0.906147	0.4821	35768.8	3606
茂名	0.395844	251192	17.87	561.052	45	25	345929	2409	11958	0.00533462	3.03	15.74	0.405244	1913.57	1.10147	0.0640893	208.19	914.436	18482.2	0.0479	1.63029	29.5934	417.365	4.0585	59.6626	0.429532	0.982481	0.5744	2979.2	2506
肇庆	0.358576	187628	19.13	281.179	48	32	165544	2149	4944	0.0034196	16.19	45.01	0.40341	2178.29	1.54594	0.0536504	175.32	590.058	19217	0.0459	0.950158	13.5708	329.045	3.85459	45.1495	0.391195	0.830382	0.3047	4476.5	4524
清远	0.318187	295999	14.07	204.134	52	32	163995	2495	6993	0.00484624	4.58	27.45	0.312793	1576.16	1.05764	0.0432932	110.06	430.182	16523.8	0.0172	1.2274	32.7195	132.924	3.28282	48.5612	0.408431	0.853888	0.3759	853	3058
潮州	0.24856	48460.5	13.49	845.425	46	28	43251	1035	2846	0.00408904	0.66	22.5	0.430714	2287.72	1.09204	0.0148345	41.32	166.278	16359.6	0.025	1.71501	13.1876	86.3876	3.11693	29.0139	0.408903	0.885844	0.1366	1680.6	6223
揭阳	0.26843	12110.7	13.94	1159.36	52	31	102303	889	4471	0.00758409	0.79	26.7	0.415041	2507.31	0.68973	0.0143011	55.08	292.953	15675.4	0.0379	1.4273	20.9161	294.826	3.31047	37.6948	0.427575	0.999835	0.1045	2016.5	5928
云浮	0.257838	123618	17.04	326.932	50	29	67936	1956	4443	0.0040891	#REF!	3.27	0.417004	1458.1	0.713712	0.033767	102.56	277.329	16646.2	0.1683	1.13926	11.7613	84.6549	3.70507	43.5489	0.503141	1.02595	0.1593	755.2	1349
2020
广州	0.631118	128011	23.35	2585.13	44	23	99820	2363	2730	0.00172308	4.282	54.82	0.336796	1783.18	0.750275	0.00165392	125.117	514.029	31266.3	0.21282	1.2453	333.836	257.49	2.83145	54.2361	0.0762456	0.268907	18.1916	1.25721e+06	155835
深圳	0.533701	3617.53	15	8828.07	38	19	2724	126	25	0.00830604	0.6	6.25	0.338274	1175.84	0.763408	0.000222017	122.389	48.8467	22814.6	0.0488	0.349207	592.679	19.9291	1.68273	28.4102	0.000642403	0.17332	13.7677	530374	222412
珠海	0.368154	32904.1	22.04	1410.69	37	19	5636	1740	199	0.00507476	2.676	17.33	0.390977	1302.37	1.17042	0.000282087	27.1214	93.0576	31118.6	0.10097	0.848257	99.566	25.52	3.05192	45.7503	0.0396979	0.278569	1.9208	61173.3	24434
汕头	0.370294	58974.1	15.15	2502.65	36	19	48863	1157	2227	0.00852567	0.656	36.88	0.450347	2546.27	1.56833	0.00718826	31.4174	229.869	18962.5	0.0387	1.95345	29.9312	391.87	2.97187	36.4028	0.394991	0.80283	0.49808	28894.5	21959
佛山	0.445177	64467.9	19.21	2506.45	44	22	26552	1278	1097	0.0018102	1.063	59.98	0.348381	1674.65	1.60124	0.00189688	92.0095	368.552	33440.2	0.0219	1.3862	103.34	296.02	3.00262	40.4652	0.0534964	0.245934	3.08518	130195	73870
韶关	0.33169	228671	16.71	155.074	37	24	94622	4425	3756	0.0118952	5.162	19.92	0.414553	1620.74	0.964642	0.0489899	172.005	335.098	18288.7	0.04345	0.929041	23.8373	58.4776	3.44567	67.7512	0.362442	0.824315	0.30544	7171.5	4574
河源	0.304815	143823	13.06	181.146	35	22	117779	1449	2235	0.0056949	8.014	0.84	0.40189	1354.11	0.831281	0.0245475	79.6609	212.761	17313.4	0.0576	1.11983	33.6459	85.6	2.85474	65.7462	0.468634	0.952305	0.37005	1991.2	4098
梅州	0.343684	175906	19.4	244.004	34	22	144926	3361	4383	0.00826175	14.186	10.58	0.407672	2252.13	1.26549	0.0319734	133.927	389.263	17430.1	0.0641	1.30405	33.4567	159.94	3.44662	53.0457	0.438914	1.04901	0.32467	5531.9	4074
惠州	0.383614	149056	16.79	533.797	36	20	82867	2623	4230	0.00431808	10.003	35.03	0.357228	1799.7	1.00456	0.0121074	111.906	345.629	24925.1	0.0691	1.2312	58.8655	360.343	2.80527	38.2074	0.178912	0.417056	0.87451	18998	19059
汕尾	0.226935	108725	15.04	548.689	32	18	56701	1782	2256	0.0042	1.749	21.44	0.349467	1707.81	0.655386	0.0145944	110.658	261.453	17732.3	0.0695	1.48338	17.5942	119.505	3.18523	43.3094	0.330163	0.978684	0.19211	1142.5	2672
东莞	0.428113	35515.6	19.83	4261.49	38	24	3056	340	502	0.00261964	2.005	17.89	0.337614	1370.27	0.375845	9.97749e-05	48.8025	46.5165	38827.2	0.11729	2.11872	56.5891	364.26	2.11332	32.1645	0.00571626	0.545251	3.04794	84986	74303
中山	0.343478	48329.9	14.22	2484.26	34	20	11677	1207	567	0.00259234	2.126	30.73	0.334668	1571.69	1.88597	0.000280585	81.2316	117.834	37632.8	0.0393	1.53116	29.9109	125.836	2.76468	36.1423	0.00151791	0.638647	0.83679	3108.6	39698
江门	0.390515	210117	20.16	505.327	41	21	121940	5930	5808	0.0017651	9.053	51.17	0.352032	1507.01	1.17145	0.0250635	181.394	500.837	21129.4	0.11465	1.03428	25.4585	273.1	3.39578	51.9411	0.316974	0.517112	0.70696	3743.9	16891
阳江	0.307973	211714	24.43	327.544	36	21	94151	1529	3997	0.00135985	2.043	8.52	0.34974	1137.16	0.524209	0.0614916	112.102	425.887	19981.8	0.0609	1.38233	7.7269	101.85	2.78351	62.0477	0.479013	0.925055	0.34107	10088.4	5060
湛江	0.466355	507169	10.29	526.336	36	21	426371	2643	15416	0.00304172	0.556	31.77	0.356801	1804.03	1.93247	0.0311	433.188	990.937	18758.2	0.68463	1.79703	25.8331	314.696	3.54833	59.8292	0.401285	0.918508	0.53293	87264.3	5459
茂名	0.374759	251192	18.1	540.795	46	21	331140	2424	11223	0.00399475	2.638	15.74	0.407479	1971.16	1.17543	0.0605497	213.589	1038.5	19621.2	0.0359	1.65312	15.8774	393.38	3.74375	59.7476	0.433823	0.989572	0.39306	3541.9	3575
肇庆	0.3597	187628	19.94	276.465	40	23	161193	2101	4817	0.00364242	13.346	45.01	0.40564	2243.45	1.6604	0.0398436	177.757	675.208	20627.5	0.11239	0.958651	33.3265	195.68	3.55904	45.8039	0.394001	0.816798	0.3118	4706.2	6326
清远	0.327797	295999	14.54	208.767	53	28	159229	2460	6589	0.00449033	4.598	27.45	0.316717	1586.64	1.06505	0.0412843	111.68	483.943	17881.3	0.0599	1.0805	18.2857	93.2778	3.17162	48.5304	0.412004	0.852501	0.4033	806	4641
潮州	0.271455	48460.5	14.97	815.801	42	24	41265	1031	2496	0.00377399	0.608	22.5	0.431497	2299.39	1.12711	0.0112608	45.5187	184.49	17265.7	0.0237	1.76571	10.9343	78.298	3.04034	32.1359	0.421354	0.881782	0.1906	4120.7	9682
揭阳	0.294038	121111	15.04	1059.41	46	28	100488	894	4353	0.00852465	1.029	26.7	0.412477	2525.52	0.729188	0.0148739	54.8301	324.14	16311.9	0.047	1.48137	10.9269	264.35	3.14983	40.8823	0.438848	0.991421	0.15111	2193.4	9126
云浮	0.238389	123618	17.39	306.187	39	22	66979	1695	4311	0.00263426	9.239	3.27	0.413535	1532.54	0.773416	0.0298662	103.875	315.071	17776.9	0.0588	1.14577	11.5416	79.8	3.67702	47.1242	0.509398	0.996428	0.14889	639.3	1915
2021
广州	0.629975	50766.2	24.5096	2598.7	46	39	97831.8	2106	2655.01	0.00261052	1.608	54.82	0.343892	1835.92	0.772517	0.00249351	127.299	542.55	34533.3	0.25	1.24539	312.908	328.421	2.7008	56.6239	0.0741965	0.267046	20.14	1.44695e+06	189516
深圳	0.541859	160556	12.44	8901.28	37	31	2425.2	1027.9	23.9874	0.00585035	0.6	6.25	0.290418	1258.66	0.831635	0.000321351	122.389	46.2885	25251.8	0.03	0.353917	613.965	21.8457	1.62063	29.3644	0.000664985	0.183773	14.92	500740	279177
珠海	0.358214	2938.11	22.18	1429.97	37	30	5424.6	1793.7	192.639	0.0043331	1.055	17.33	0.38251	1294.95	1.22241	0.00139985	27.3711	98.9371	34394	0.1	0.852266	96.2311	29.3508	2.87162	47.3872	0.0494499	0.275185	1.69	70688.1	27201
汕头	0.354583	6433.15	11.97	2509.03	35	33	48233	645.42	1426.94	0.00412647	0.821	44.8	0.446121	2573.9	1.43464	0.007879	31.1268	236.036	20819.2	0.02	1.96299	25.0212	415.084	2.87929	38.8109	0.398306	0.791516	0.6	34679.9	26036
佛山	0.422129	28498	19.25	2531.1	46	38	24711	1257.7	1067.23	0.00150619	0.89	59.98	0.350806	1683.21	1.60757	0.00679263	92.7706	394.242	37067	0.02	1.3993	112.661	109.5	2.63397	41.5174	0.0510298	0.246031	3.09	141576	96487
韶关	0.310028	20849.2	15.59	155.333	39	35	92817	3664.54	3664.94	0.00555367	5.765	20.12	0.417405	1632.85	0.953726	0.0746807	174.602	360.413	20252.9	0.04	0.935503	18.8304	69.2826	3.46002	73.7946	0.360135	0.818048	0.25	7211.1	5303
河源	0.309982	110901	14.62	181.485	39	31	118565	1620.7	2188	0.00398749	9.112	0.84	0.406749	1352.03	0.796848	0.0355437	80.9224	240.558	19146.3	0.06	1.12177	19.6635	92.8711	2.90489	71.9103	0.463011	0.937977	0.42	1657.6	4719
梅州	0.353697	413923	16.76	244.376	33	28	142616	3339.36	4319.18	0.00617734	15.75	10.58	0.413212	2282.73	1.26117	0.0390067	135.955	388.603	19241.2	0.1	1.3095	20.885	164.3	3.29092	57.7007	0.436081	1.03026	0.33	9241.4	4137
惠州	0.38434	166174	16.15	534.432	40	33	80749	2680.09	3905	0.00275246	6.127	35.03	0.362251	1823.25	0.994399	0.0174024	108.874	387.459	27580	0.08	1.23741	74.2697	393.805	2.77311	39.3076	0.183445	0.416617	0.85	31365.8	25624
汕尾	0.213215	106708	10.79	552.291	32	27	55231	1866	2228	0.00437097	3.6	21.44	0.353403	1747.54	0.595623	0.0264399	112.38	278.44	19884.5	0.07	1.50629	28.5389	131.925	3.28014	45.9265	0.355622	0.961591	0.13	5618.8	2749
东莞	0.448466	91122.9	21.61	4282.59	42	36	2986	393	507	0.00488147	0.81	17.89	0.33615	1399.02	0.354554	0.000101947	49.0525	53.3753	43187.8	0.12	2.1364	52.541	409.047	2.07294	32.7073	0.00525065	0.545251	3.57	133734	94573
中山	0.346795	107375	11.8	2508.1	39	34	11195	1344	532	0.00279291	1.063	30.73	0.344669	1591.73	2.06687	0.000326692	81.3357	139.835	41749.9	0.07	1.53061	44.94	135.832	2.5282	36.9899	0.00177349	0.256755	0.97	4134	41513
江门	0.377556	75872.1	20.17	507.08	45	40	120975	5844.58	5683.41	0.00154945	4.395	51.17	0.353315	1613.27	1.12986	0.0340996	183.831	542.245	23376.4	0.07	1.04032	17.0034	283.6	3.27744	53.3371	0.312977	0.50909	0.71	8534.6	21272
阳江	0.277937	104927	21.92	328.953	37	34	89319.5	1848	3520	0.00208463	1.633	8.52	0.348861	1140.95	0.554031	0.0783788	113.927	407.057	22195.6	0.04	1.38466	10.1759	109.521	2.79428	62.4108	0.476456	0.913077	0.19	7126.7	6133
湛江	0.445182	106918	13.71	530.083	37	32	407678	2788.01	15010	0.00176127	1.01	31.77	0.360049	1821.99	1.92687	0.041387	439.312	1043.24	20692.7	0.68	1.80459	18.0414	342.98	3.37748	61.0818	0.402804	0.913965	0.49	77121.4	6151
茂名	0.37746	175393	17.68	543.146	41	35	307827	2575.06	8162.57	0.00321516	3.322	15.74	0.406822	1994.84	1.23905	0.0723032	218.478	1042.75	21561.2	0.03	1.67301	16.2692	436.18	3.57424	62.0159	0.434735	0.985546	0.46	4206.5	4513
肇庆	0.334746	9117.81	17.57	277.321	38	35	161438	2515	4722	0.0020868	8.806	45.01	0.408994	2267.73	1.74733	0.0595146	179.721	721.751	22688.7	0.07	0.952229	19.1221	211.87	3.27011	48.8776	0.396133	0.814418	0.27	5594.2	7584
清远	0.323682	7180.72	15.04	209.23	40	33	155741	2362	6661	0.00328776	3.564	27.45	0.325023	1638.36	1.05409	0.0553959	112.72	508.269	19841.2	0.08	1.09272	23.7665	102.325	2.9912	49.3723	0.434391	0.836798	0.48	909.2	6241
潮州	0.258456	18465.2	13.7126	814.775	41	33	39547	1070	2318	0.00282764	1.06	23.29	0.425041	2303.31	1.15091	0.0127302	45.2417	196.274	19133.6	0.02	1.77727	8.3844	84.4175	2.88893	29.8299	0.425376	0.872835	0.21	7361.2	10070
揭阳	0.28132	60694.1	13.8444	1066.6	44	41	102019	901.7	4571	0.00463488	1.82	26.7	0.409265	2569.95	0.793449	0.0162133	56.2787	331.04	18015.8	0.05	1.48375	10.03	296.04	3.15638	41.6518	0.437626	0.982339	0.15	2374.3	10382
云浮	0.190435	73878.8	17.4927	307.418	44	40	61384	1384	4082	0.00275689	8.019	3.28	0.416482	1569.15	0.790612	0.0506438	105.305	346.468	19675.1	0.07	1.14708	11.5932	93.935	3.50495	49.2834	0.499937	0.972047	0.14	1591.6	2776
2022
广州	0.611532	50767.6	23.66	2588.13	39	22	96890.6	2989.9	2610.41	0.00243039	1.5	54.82	0.343232	1836.93	0.774539	0.00270096	128.619	568.769	36292.3	0.17	1.24946	247.971	337.46	2.73691	58.986	0.0733048	0.257675	21.2	1.3779e+06	146854
深圳	0.526148	4905.68	12.58	8888.68	31	16	1549.2	242.65	34.5	0.00622706	0.5	6.25	0.340292	1290.27	0.535738	0.00032273	125.381	48.2643	26524.4	0.02	0.353917	646.543	22.329	1.63185	30.5654	0.000707742	0.188894	14.66	367012	275774
珠海	0.345899	6433.25	22.25	1436.04	30	17	5248.05	1851	185.54	0.00380921	1	17.54	0.364083	1306.34	1.20288	0.00326982	27.6476	121.415	35828.6	0.08	0.866931	77.7777	29.2509	3.00853	50.1817	0.0549007	0.300218	1.75	45145.3	27764
汕头	0.358115	28498.7	15.25	2513.88	33	17	47387	878.2	909.49	0.00193873	0.85	44.8	0.447874	2586.21	1.47439	0.00819214	31.0984	254.954	22056.8	0.02	1.96429	19.0125	411.52	2.94109	40.2858	0.428734	0.727025	0.54	69037.5	25315
佛山	0.412381	20850.5	19.58	2515.23	38	21	23651	1201	1004	0.00104816	0.8	59.98	0.353275	1695.78	1.57524	0.0082912	92.0559	429.404	38971.3	0.04	1.37334	71.0244	110.27	2.80092	42.9499	0.0757723	0.243481	2.76	145498	106422
韶关	0.317173	160557	16.75	155.426	35	22	91209.4	3749.18	3593.85	0.00562047	5	20.12	0.413875	1601.47	0.98921	0.0798099	177.286	375.385	21234.3	0.07	0.93418	16.1526	71.6883	3.49288	77.315	0.364596	0.765183	0.29	7155.9	4103
河源	0.289772	104929	13.88	181.536	31	18	113501	1733.39	2189.16	0.00387002	8.529	0.84	0.405414	1358.35	0.830512	0.037935	82.266	253.753	20189.6	0.04	1.12524	15.4179	88.8	2.96996	72.3335	0.464475	0.887356	0.33	1523.7	4230
梅州	0.319407	107379	16.95	243.184	28	18	139937	3378.19	4288.7	0.00292063	18.5	10.58	0.411724	2313.39	1.26649	0.0412131	137.77	410.936	20289.6	0.06	1.30868	16.9412	163.32	3.3865	60.5599	0.431208	0.960264	0.27	7422.9	3521
惠州	0.386977	91124.4	16.14	533.04	33	17	79681	2764.38	3875	0.0024587	6.3	35.03	0.362754	1857.03	1.00269	0.0187597	108.342	434.25	28963.7	0.07	1.23528	75.2163	406.064	2.78817	41.2862	0.191432	0.406763	0.98	56433.6	27613
汕尾	0.202626	73905.3	11.66	551.345	27	15	53822.9	1092.26	2198.8	0.0024508	3	21.44	0.356917	1778.39	0.655202	0.0278088	112.775	309.242	21226.8	0.05	1.5108	23.7667	131.29	3.21785	45.7057	0.373928	0.91881	0.15	1886.5	3077
东莞	0.40865	9118.25	19.56	4242.03	36	20	2874	393	489	0.00407935	0.8	0	0.335735	1366.6	0.320949	0.000124557	49.2555	55.0829	45135.8	0.08	2.1364	42.8824	414.382	2.05391	33.6064	0.00493437	0.0845549	3.69	132979	95581
中山	0.347046	7181.65	15.05	2488	34	19	10263	1429	495	0.00413904	0.8	30.73	0.347121	1642.88	2.19761	0.000315949	81.5295	146.787	43490.2	0.06	1.58668	46.3125	139.26	2.524	38.3517	0.00218907	0.273205	1.05	4340.8	43328
江门	0.376253	110902	20.39	505.727	40	20	120201	5909.92	5621.34	0.000887792	5.001	51.17	0.352791	1708.7	1.07167	0.0364771	186.919	595.196	24742.2	0.06	1.04596	13.8725	291.92	3.34098	54.5498	0.31158	0.500332	0.78	6963.3	20501
阳江	0.273717	106918	20.99	329.141	34	21	88434	1507	3500.95	0.00183712	1.999	8.52	0.348529	1155.88	0.560602	0.0812676	115.801	420.325	23431.1	0.03	1.38455	9.8314	112.77	2.93783	62.623	0.482229	0.849325	0.21	10556.5	5338
湛江	0.472273	413925	17.19	530.421	32	21	409016	2894.78	15409	0.00168348	1	31.77	0.363181	1855.93	1.90417	0.045669	443.363	1104.08	21713.2	0.59	1.80625	15.7292	349.353	3.46067	63.84	0.40771	0.838517	0.58	101986	6388
茂名	0.370419	166176	17.71	544.735	35	19	303592	2920.87	7816.73	0.00420783	3	15.74	0.406566	2020.92	1.24622	0.0756789	222.575	1130.02	22444	0.04	1.67408	14.9935	441.914	3.58732	62.5806	0.439149	0.90975	0.44	6233.7	3883
肇庆	0.33883	106710	19.24	277.233	35	22	160785	2544.92	4683.7	0.0013789	8.8	45.01	0.410448	2233.23	1.79889	0.0608468	184.004	759.418	23653.4	0.06	0.950111	24.1903	212.06	3.28636	50.8962	0.399331	0.791324	0.28	5118	8999
清远	0.321593	175395	14.81	209.383	33	21	154389	4329.54	6601.08	0.00251474	5.999	27.45	0.325081	1647.79	1.17689	0.0584088	116.05	552.445	20803.4	0.02	1.08661	18.6692	100.762	3.09236	48.9099	0.469328	0.794264	0.46	1019.6	5881
潮州	0.247509	18466.1	13.92	815.092	33	20	39309.2	1099.7	2228.86	0.00170604	1.073	23.29	0.435498	2322.38	1.17914	0.0132008	45.9355	209.99	20274.8	0.02	1.79924	12.2961	85.64	3.09085	31.0918	0.443586	0.831806	0.16	4043.5	9915
揭阳	0.273752	60695.9	15.15	1069.88	41	23	100952	1002.82	4490.89	0.00339676	1	26.7	0.411414	2630.39	0.847777	0.0166841	57.4243	354.377	18959.3	0.03	1.48581	7.1121	302.796	3.36233	45.0595	0.449371	0.94047	0.14	2394.8	10277
云浮	0.260744	73880.1	19.55	307.829	40	21	44739	1366.77	3816.71	0.002555	11.4	3.28	0.416271	1591.7	0.851485	0.0537033	106.92	358.195	20786.9	0.22	1.14841	11.6078	100.28	3.61702	50.2858	0.502316	0.912456	0.17	5612.3	2490
2023
广州	0.644879	49513.9	23.6643	2600.97	41	23	95945.6	2867.38	2561.39	0.00173674	1.619	54.82	0.336654	1850.23	0.787398	0.00282643	129.75	582.793	38606.7	0.18475	1.15952	246.107	385.61	2.66142	62.1825	0.0712777	0.259429	19.0347	1.3582e+06	118070
深圳	0.542358	160929	12.5803	8953.22	35	18	1831.05	138.01	22.009	0.00524412	0.51	8.12	0.296977	1238.31	0.75234	0.000245378	125.382	49.9584	26740.9	0.01871	0.351674	585.362	20.97	1.68792	31.6446	0.000753565	0.167481	13.9943	425935	135112
珠海	0.361973	4968.6	22.251	1445.79	33	18	5210.28	1864.4	150.87	0.00176225	1.095	17.54	0.369351	1290.31	1.15631	0.00351429	28.2585	129.776	38025.2	0.0875	0.879519	71.4169	30.21	3.02016	53.9112	0.0450852	0.306596	1.57144	54676	24551
汕头	0.355971	6274.75	15.34	2520.76	35	20	46297	880.33	830.376	0.00122534	0.844	44.8	0.44671	2578.18	1.54619	0.008643	30.9903	267.137	22969.9	0.0134	1.98477	20.4704	429.13	2.97153	42.6325	0.429642	0.709913	0.38956	24931.9	22288
佛山	0.447225	28120.8	19.5844	2531.84	39	23	22854	1133	975	0.00113738	0.869	59.98	0.349898	1706.35	1.96403	0.00829586	91.5593	449.214	41423.4	0.05358	1.24244	83.0368	119.31	2.62953	43.9378	0.0735208	0.249084	2.58063	97095.4	87421
韶关	0.328013	20395.1	16.7855	155.203	38	24	89961.3	3896.19	3483.94	0.0074036	5.362	20.12	0.415031	1613.31	1.03695	0.0858152	179.651	393.208	22603.3	0.10433	0.946018	9.7531	73.27	3.5291	78.9201	0.363461	0.755613	0.19136	7155.4	3045
河源	0.29547	110773	15.4497	181.319	38	20	110016	1807.33	2141.11	0.00269245	11.735	0.84	0.406116	1357.44	0.842397	0.0416426	83.7107	268.458	21875	0.04919	1.14136	15.649	91.8145	3.09781	73.4771	0.46389	0.843344	0.21276	1195.8	2899
梅州	0.389923	413577	19.2378	242.623	31	19	137100	3453.93	4236.53	0.00261284	11.172	10.58	0.41151	2318.11	1.28624	0.0450135	139.922	422.104	21706.9	0.03779	1.32148	13.9793	210.96	3.51188	64.3085	0.428267	0.927206	0.60889	9001.1	2535
惠州	0.391391	166069	16.9475	535.084	36	19	79115	2822.5	3798	0.00303386	5.989	35.03	0.359894	1891.38	1.00824	0.0195232	108.19	458.279	30530	0.03582	1.27963	89.7946	324.74	2.79823	42.4029	0.190367	0.397724	0.48644	30578.8	22545
汕尾	0.226862	106908	15.6048	553.133	30	17	52789.4	1112.06	2163.27	0.00105532	2.828	21.44	0.348965	1810.63	0.681974	0.0290793	114.087	321.524	22741.3	0.02871	1.54646	18.0005	133.82	3.02793	45.3275	0.3827	0.889616	0.0947	4797.1	2890
东莞	0.429101	90938.6	19.5597	4261.66	38	21	2771.3	387	452.6	0.00376635	0.799	0	0.330053	1399.52	0.356163	0.00013888	49.4655	56.0159	46864.7	0.02133	1.43657	47.0797	440.5	2.0539	34.3309	0.00440712	0.0932733	3.19051	111165	81117
中山	0.392075	107274	15.0509	2503.21	35	20	9866	1320	484	0.00260216	0.866	30.73	0.351268	1675.34	2.27859	0.000271298	81.7478	154.784	45770.2	0.0969	1.59968	59.4842	148.69	2.70327	37.4209	0.00257705	0.278638	1.0102	5863.2	39745
江门	0.398173	74801.3	20.7863	505.748	41	22	118843	5990.61	5559.52	0.00130275	5.379	51.17	0.351726	1752.61	1.08708	0.0390207	189.29	632.629	26130	0.08576	1.06106	11.8559	304.63	3.31079	56.7249	0.308861	0.486111	0.62612	7316.8	15649
阳江	0.326864	106071	25.7946	329.455	36	21	87352	1472.7	3227.63	0.00115692	2.205	8.52	0.34942	1162.57	0.593723	0.0882035	119.365	425.911	24657.1	0.04379	1.39229	6.4299	116.67	2.94719	61.0203	0.481993	0.84922	0.38479	10087	5126
湛江	0.431125	108583	20.0397	533.663	33	20	408298	2881.06	15378.8	0.00143927	1.008	31.77	0.35731	1876.17	1.92578	0.0491777	446.831	1134.81	22762	0.09237	1.838	21.3578	377.26	3.53118	65.7733	0.407717	0.845427	0.31258	86986.4	5732
茂名	0.417111	175735	18.2822	545.967	36	21	302411	2985.04	7596.86	0.00427867	2.953	15.74	0.406492	2022.5	1.28675	0.0786991	227.023	1153.06	23856.2	0.01041	1.70563	9.8891	472.75	3.43401	64.589	0.440829	0.9075	0.66048	10893.6	3329
肇庆	0.420933	8874.54	23.6352	277.455	38	23	160428	2574.19	4626.17	0.0067502	8.866	45.01	0.408492	2208.04	1.82818	0.062382	186.456	780.539	24808.8	0.10959	0.954974	16.0933	232.8	3.29991	52.102	0.402636	0.760019	0.66186	5519.4	7348
清远	0.326334	6811.98	14.8682	209.435	39	23	152937	2404	6503	0.0028205	7.229	27.45	0.324352	1669.82	1.26337	0.0633065	117.06	570.738	22099.3	0.02162	1.09735	12.9855	107.5	3.10977	48.7747	0.465702	0.778417	0.32647	1190.6	4423
潮州	0.276957	18402.9	14.1698	815.282	37	24	39525.2	1155.58	2140.07	0.000995141	1.186	23.29	0.43092	2323	1.17881	0.013668	46.8739	222.338	21721.5	0.00703	1.83704	8.0703	91.78	3.19776	30.9991	0.443769	0.806526	0.20802	3886.5	8850
揭阳	0.341605	60655	15.11	1073.58	47	26	100492	1009.58	4404.3	0.00547233	1.227	26.7	0.409651	2610.21	0.909446	0.0178353	59.1792	364.252	19846.7	0.08817	1.55966	8.9083	313.03	3.39336	44.844	0.44734	0.906343	0.28831	2411.1	9119
云浮	0.234854	73974.4	17.9807	307.842	39	21	43887	1373.21	3654.35	0.00187176	7.146	3.28	0.416133	1598.68	0.851472	0.0599353	108.145	364.559	21908.7	0.11778	1.1592	9.9895	105.19	3.71456	51.7608	0.501109	0.888515	0.11697	1222	1890
